# Supplementary material for: Three years of soil moisture observations by a dense cosmic-ray neutron sensing cluster at an agricultural research site in north-east Germany
Source: Copernicus journal article supplement (doi:10.5194/essd-2023-19), 2023-03-22
Supplement: Supplementary file [file essd-2023-19-AC2-supplement.pdf]

## Author Response to Referee #2

# Three years of soil moisture observations by a dense cosmic-ray neutron sensing cluster at an agricultural research site in north-east Germany

Maik Heistermann et al.

*Earth Syst. Sci. Data Discuss.*, doi:10.5194/essd-2023-19

---

**RC: Referee Comment,**    **AR: Author Response,**     Manuscript text

Dear referee,

thank you very much for your positive response, and for the time and effort spent to examine the manuscript and the data set. Please find our response to your comments below.

Kind regards,  
Maik Heistermann (on behalf of the author team)

### Comments and responses

**RC:** *[...] I suggest adding one column in Table 1 showing the range of measured values on this site with an indication of the mean or median value, for each measured variable.*

**AR:** We appreciate the suggestion. However, Tab. 1 is already very bulky, and represents a great diversity of variables (also for a large number of locations). Providing statistics like minimum, maximum, mean or median for all these variables in the context of such a table is, in our view, not feasible *in a meaningful way*, and also not in the interest of the audience. We would prefer not to extend Tab. 1 in such a way. For the key features of the dataset, we think that Fig. 3 provides an intuitive overview that should better serve the purpose. We hope that the referee agrees.
